# Supplementary material
Source: Elsevier journal article supplement (https://www.sciencedirect.com/science/article/pii/S2531043718301491)
Supplement: mmc1 [file S2531043718301491:mmc1.docx]

**Title:** **Functionality of patients with Chronic Obstructive Pulmonary Disease at 3 months follow-up after elastic resistance training: a randomized clinical trial**

**Authors’ names:** Isis Grigoletto Silva Pta Bruna Spolador de Alencar Silva MScb Ana Paula Coelho Figueira Freire MSca Ana Paula Soares dos SantosPta Fabiano Francisco de Lima Msca Dionei RamosPh.Da Ercy Mara Cipulo Ramos Ph.Da

a Department of Physical Therapy, São Paulo State University (UNESP), Faculty of Science and Technology, Presidente Prudente, São Paulo, Brazil

b Department of Physical Education, São Paulo State University (UNESP), Institute of Biosciences, Rio Claro, São Paulo, Brazil

**E-mail:**

Isis Grigoletto Silva – isis_grigoletto@hotmail.com

Bruna Spolador de Alencar Silva – brunaspolador@gmail.com

Ana Paula Coelho Figueira Freire – anapcff@hotmail.com

Ana Paula Soares dos Santos– anasoares_santos@hotmail.com

Fabiano Francisco de Lima – fabiano_ffl@hotmail.com

Dionei Ramos– Dionei-ramos@bol.com.br

Ercy Mara Cipulo Ramos – ercy@bol.com.br

***Corresponding author:**

Isis Grigoletto Silva

São Paulo State University (UNESP), Faculty of Science and Technology, Presidente Prudente, Brazil, Department of Physical Therapy

Address: 305, Roberto Simonsen St. Presidente Prudente, SP, Brazil. Zipcode: 19060-900

Phone: +55 18 32295821

E-mail: isis_grigoletto@hotmail.com (I.G Silva)
